# Supplementary material for: Rationale and design of Ferinject® Assessment in patients with IRon deficiency and chronic Heart Failure (FAIR-HF) study: a randomized, placebo-controlled study of intravenous iron supplementation in patients with and without anaemia
Source: PubMed Central journal article supplement — Eur J Heart Fail. 2009 Nov;11(11):1084–91. doi: 10.1093/eurjhf/hfp140 (PMC2770581; doi:10.1093/eurjhf/hfp140), 2009-11
Supplement: hfp140_1.pdf [file hfp140_1.pdf]

## **Supplementary Information**

### ***Institutions where the study was performed:***

The study was performed at 75 sites in Europe and Argentina.

#### **Argentina:**

1. Dr. Jorge Horacio Altamirano, Instituto de Investigaciones Cardiológicas "Prof. Dr. Alberto C. Taquini", Marcelo T. de Alvear 2270, Ciudad de Buenos Aires , Argentina
2. Dr. Silvia Viviana Rodriguez, Instituto de Diagnóstico Cardiovascular La Plata, Calle 13 N°525, La Plata, Provincia de Buenos Aires, Argentina

#### **Czech Republic:**

3. Prof. MUDr. Jiří Horák, Fakultní nemocnice Kralovské Vinohrady, I. Interní oddelení, Šrobárova 50, Prague 10, Czech Republic
4. MUDr. Jan Bělohávek, Všeobecná fakultní nemocnice, II. Interní oddělení, U Nemocnice 2, Prague 2, Czech Republic
5. MUDr. Zoltán Palúch, Fakultní Thomayerova nemocnice, I. Interní klinika, Vídeňská 800, Prague 4, Czech Republic
6. MUDr. Jiří Povolný, Oblastní nemocnice Kladno, Interní oddelení, Vančurova 1548, Kladno, Czech Republic
7. Prof. MUDr. Jindřich Špinar, CSc, Fakultní nemocnice Brno - Bohunice, Interní klinika kardiologie, Jihlavská 20, Brno, Czech Republic

**Germany:**

8. Prof. Stefan Anker, Charite Berlin, Campus Virchow Klinikum, Med. Klinik m. S. Kardiologie, Angewandte Kachexieforschung, Augustenburger Platz 1, Mittelallee 2, 4.OG, Berlin, Germany
9. Dr. med. M. Natour, Praxis Dr. M. Natour und M. Durak, Mönchhofstr. 4 A, Heidelberg, Germany
10. Dr. Dörte Wolf, CardioSec Clinical Research GmbH, Peterstrasse 5, Erfurt, Germany

**Greece:**

11. Prof. Kremastinos Dimitrios, University Hospital of Athens "Attikon", 2nd Department of Cardiology / Heart Failure Clinic, 1 Rimini Street, Haidari, Athens, Greece
12. Prof. Dimitrios Alexopoulos, University Hospital of Patras, Department of Cardiology, Rio, Patras, Greece
13. Dr. Athanasios Manolis, General Hospital of Voula "Asklipion", Department of Cardiology, 1 Vasileos Pavlou Street, Voula, Athens, Greece
14. Prof. John Nanas, Alexandras General Hospital, Department of Clinical Therapeutics, 80 Vassilisis Sofias Av. & K. Lourou, Athens, Greece

**Italy:**

15. Prof. Volterrani, IRCCS San Raffaele Pisana, Riabilitazione Cardiologica, Via Della Pisana 235, Roma, Italy
16. Dr. Giorgio Vescovo, ULSS 6 Ospedale San Bortolo, Medicina I, Via F. Rodolfi, 37, Vicenza, Italy

**Norway:**

17. Professor Kenneth Dickstein, Stavanger Helseforskning AS, Pb 3118 Hillevåg,  
Stavanger, Norway

**Poland:**

18. Prof. Piotr Ponikowski, 4 Wojskowy Szpital Kliniczny z Polikliniką - SP ZOZ,  
Ośrodek Chorób Serca Klinika Kardiologii, ul. R. Weigla 5, Wrocław, Poland

19. Prof. Mirosław Dłużniewski, Wojewódzki Szpital Bródnowski, Katedra i Klinika  
Kardiologii, Nadciśnienia Tętniczego i Chorób Wewnętrznych, Kondratowicza 8,  
Warszawa, Poland

20. Prof. Michał Mysliwiec, Wojewódzki Szpital Specjalistyczny im. K. Dłuskiego,  
Oddział Nefrologii I Transplantologii, ul. Żurawia 14, Białystok, Poland

21. Dr. Michał Ogorek, Samodzielny Szpital Wojewódzki im. M. Kopernika, Oddział  
Kardiologii, Rakowska 15, Piotrków Trybunalski, Poland

22. Prof. Lech Polonski, Śląskie Centrum Chorób Serca, III Katedra i Oddział  
Kliniczny, Szpitalna 2, Zabrze, Poland

23. Dr. Paweł Staneta, NZOZ Specjalistyczna Przychodnia Lekarska „MEDIKARD”,  
Ul. Padlewskiego 4, Płock, Poland

24. Dr. Joanna Niegowska, Centrum Medyczne „TELMONT MED” Sp. z o.o., Ul.  
Szpacza 2, Warszawa, Poland

**Romania:**

25. Prof. Gheorghe Andrei Dan, Spitalul Clinic Colentina, Cardiologie, Sos. Stefan cel  
Mare nr.19-21, Bucuresti, Romania

26. Prof. Pal Istvan Kikeli, Societatea Civila Medicala Procardia Medical, Str. Mihai Eminescu nr.3, Targu Mures, Romania

27. Prof. Dr. Cezar Eugen Macarie, Institutul de Boli Cardiovasculare "Prof. Dr. C.C. Iliescu", Cardiologie, Sos. Fundeni nr.258, Bucuresti, Romania

28. Prof. Dr. Mariana Radoi, Spitalul Clinic de Urgenta Brasov, Cardiologie, Str. Independentei nr.1, Brasov, Romania

**Russia:**

29. Prof. O.P. Alexeeva, City Hospital # 33, 54, Lenina prosp., Nizhny Novgorod, Russia

30. Prof. V.N. Ardashev, Main Military Clinical Hospital Named After Acad. N.N. Burdenko, 3, Gospitalnaya pl., Moscow, Russia

31. Prof. G.P. Arutyunov, City Clinical Hospital #4, Build. 13, 2nd floor, 25, Pavlovskaya ul., Moscow, Russia

32. Prof. B.Ya. Bart, Russian State Medical University Chair of Outpatient Therapy based on DCC # 1, 1, Ostrovityanova ul., Moscow, Russia

33. Dr. O.A. Berkovich, St. Petersburg State Medical University n.a. I.P.Pavlov, 6/8, Lev Tolstoi ul., St. Petersburg, Russia

34. Dr. S.A. Boldueva, St. Petersburg State Medical Academy n.a. I.I. Mechnikov, 47, Piskarevskiy prosp., building 16, St. Petersburg, Russia

35. Prof. A.A. Eremenko, Russian Scientific Centre of Surgery n.a. B.V. Petrovsky of Russian Academy of Medical Sciences, 2, Abrikosovsky pereulok., Moscow, Russia

36. Dr. A.E. Bragina, City Clinical Hospital # 61, 15, Dovatora ul, Moscow, Russia

37. Prof. A.Ya. Ivleva, Outpatient Clinic #3 of President RF Administration, 31,  
Groholsky per., Moscow, Russia
38. Prof. Z.D. Kobalava, Russian State People Friendship University based on City  
Clinical Hospital #64, 6, Mikluho-Maklaya ul., Moscow, Russia
39. Prof. V.A. Kostenko, St. Petersburg Scientific Research Institute for Emergency  
n.a. I.I.Djanelidze, 3/5, Budapeshtskaya ul., St. Petersburg, Russia
40. Prof. V.A. Lusov, Russian State Medical University, Chair of Therapy based on  
City Clinical Hospital #15 named after O.M. Filatov, 1, Ostrovityanova ul.,  
Moscow, Russia
41. Prof. V.Yu. Mareev, Cardiology Research Complex, 15a, Tcherepkovskaya ul.,  
Moscow, Russia
42. Dr. S.R. Minkin, City Consultive-Diagnostical Centre #1, 10, Sikeyrosa ul.,  
St. Petersburg, Russia
43. Dr. A.A. Petrov, Leningrad Regional Clinical Hospital, 45, Lunacharskogo prosp.,  
St. Petersburg, Russia
44. Prof. M.Yu. Sitnikova, Research Institute of Cardiology n.a. V.A. Almazov,  
15 Parchomenko prosp, St. Petersburg, Russia
45. Prof. S.N. Tereschenko, "Moscow State Medicine and Dentistry University" of  
Federal Agency for Health Care and Social Development based on City Clinical  
Hospital # 68 , 20/1, Delegatskaya ul., Moscow, Russia
46. Prof. D.U. Butko, International Clinic & Hospital MEDEM, Lit A, Marata ul., St.  
Petersburg, Russia

47. Prof. A.A. Gorbachenkov, Central Clinical Hospital of Civil Aviation of the Ministry of transport of RF, 7, Ivankovskoye sh., Moscow, Russia
48. Elena Pasechnik, GUZ "Kaluzhskaya Regional Hospital", Department of Clinical Pharmacology , Kaluga, Vishnevskogo str. 1, Russia
49. Yury Shvarts, Saratov State Medical University of Roszdrav, "Saratov, Bolshaya Sadovaya, 137, Russia
50. S.V. Nedogoda, Regional Clinical Hospital of Volgograd, Volgograd, Ziolkovskogo str., 1 build. 5, floor 1, Russia
51. Yury Karpov, Voronezhsky Hospital of Emergency # 1 Voronezh, Patriotov prospect, 23, Russia
52. Roman Khokhlov, Voronezhsky Regional Hospital # 1, Moscow prospect., 151, Card. Department., floor 2, room 208 Voronezh, Russia
53. Dmitry Duplyakov, State Institute of Healthcare "Regional cardiology dispensary of Samara", Samara, Aerodromnaya str., 34, Russia
54. Oleynikov Valentin, GUZ "Regional Clinical Hospital n.a. N.N. Burdenko, Penza, Penza, Lermontova str., 28, build. 7, Russia
55. Koziolova Natalya Andreevna, Permsky Regional Hospital of War Veterans, Podlesnaya str., 6, Perm, Russia
- Spain:**
56. Dr. Jordi Bruguera, Hospital del Mar, Secretaría de Cardiología , Passeig Marítim, 25-29, Barcelona, Spain
57. Dr. Manuel Martínez Sellés, Hospital General Universitario Gregorio Marañón, Secretaria de Cardiología 5ª planta, Dr. Esquerdo,46, Madrid, Spain

58. Dr. Juan Quiles Granado, Hospital Universitario San Juan de Alicante, Consultas externas de Cardiología planta 4, Carretera de Alicante-Valencia s/n, San Juan de Alicante, Spain

59. Dr. José González Costelló, Hospital Universitari de Bellvitge, Secretaría de Cardiología.planta 4.2 coronarias , Feixa Llarga s/n Servicio, L'Hospitalet de Llobregat, Barcelona, Spain

**Ukraine:**

60. Prof. K.M. Amosova, Central City Clinical Hospital, National Medical University n.a. O.O. Bohomolets, Chair of Hospital therapy #1, 39/1, Shelkovichnaya Str., Kyiv, Ukraine

61. Prof. O.N. Girina, The Out-patient Clinic #2 for Adults of Shevchenkovskiy District of Kyiv, 10, Pimonenko street, Kyiv, Ukraine

62. Prof. G.A. Ignatenko, Educational Scientific Medical Center "University Clinic" of Donetsk State Medical University, Department of Cardiology, Functional Diagnostics and Therapy, 43-A, Dzerzhinskogo Str., 83003, Donetsk, Ukraine

63. Prof. O.A. Koval, City Joint Emergency Hospital, Dnepropetrovsk State Medical Academy, 65, Sverdlova Str., Dnipropetrovsk, Ukraine

64. Dr. I.P. Kovalsky, City Hospital #1, Mykolayiv, Mykolayiv region, 4, Volodarskogo Str., Mykolayiv, Ukraine

65. Prof. A.N. Parkhomenko, The Ukrainian Institute of Cardiology n. a. M.D. Strazhesko, AMS Ukraine, Reanimation and Intensive Care Department, 5, Narodnoho Opolchennya Str., Kyiv, Ukraine

66. Dr. S.S. Pavlyk, Lviv Regional State Clinical Treatment-and-Diagnostic Cardiology Center, Myocardial Infarction Department, 35, Kulparkivska str., Lviv, Ukraine
67. Prof. G.S. Popik, Odessa Railway Hospital, Odessa State Medical University, Department of Family Medicine and General Practice, 3a, Heroyiv Prykordonnykiv Str., Odessa, Ukraine
68. Dr. L.V. Rudenko, Kyiv Emergency Care Hospital, Infarction Department, 3, Bratislavskaya Str., Kyiv, Ukraine
69. Prof. V.I. Tseluyko, City Clinical Hospital #8, Kharkov Medical Academy of Postgraduate Education, 266-G, Saltovske shosse, Kharkiv, Ukraine
70. Prof. V.A. Vizir, Medical Sanitary unit of SE "Radioprylad", Zaporozhye State Medical University, Chair of Hospital Therapy #1, 26, Mayakovsky ave., Zaporozhye, Ukraine
71. Dr. Zinaida Telyatnikova, The 6th Therapeutic Department, Odessa City Polyclinic #20, 62, Levitana Str., Odessa, Ukraine.
72. Prof. Ivan Chohey, Divisional Clinical Hospital, Uzhgorod, Uzhgorod National University, department of therapy and family medicine of Postgraduate Education, Sobranetska 150 Uzhgorod, Ukraine
73. Dr. Igor G. Kraiz, Central Clinical Hospital "Ukrzaliznitsi", department of cardiology, Kharkiv, 5, Balakireva Str., Kharkiv, Ukraine
74. Dr. Oleksandr V. Prohorov, City Clinical Hospital #27, Department of cardiology for the treatment of patients' acute miocardial infarction, 41, Pushkinskaya Str., Kharkiv, Ukraine



Anker et al, 2009  
*European Journal of Heart Failure*

75. Dr. Victoria Y. Lishnevskaya, Institute of Gerontology AMS of Ukraine, 67,  
Vyshgorodskaya Str., Kyiv, Ukraine
